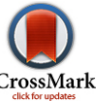

## Correction

# Correction: *De Novo* Peptide Design and Experimental Validation of Histone Methyltransferase Inhibitors

The *PLOS ONE* Staff

## Notice of Republication

This article was republished on March 27, 2014, to correct the figure order. Please download the article again to view the correct version. The originally published, uncorrected article and the republished, corrected article are provided here for reference.

## Supporting Information

**File S1.** Originally published, uncorrected article.

**File S2.** Republished, corrected article.

## Reference

1. Smadbeck J, Peterson MB, Zee BM, Garapaty S, Mago A, et al. (2014) *De Novo* Peptide Design and Experimental Validation of Histone Methyltransferase Inhibitors. *PLoS ONE* 9(2): e90095. doi:10.1371/journal.pone.0090095

---

**Citation:** The *PLOS ONE* Staff (2014) Correction: *De Novo* Peptide Design and Experimental Validation of Histone Methyltransferase Inhibitors. *PLoS ONE* 9(4): e95535. doi:10.1371/journal.pone.0095535

**Published:** April 16, 2014

**Copyright:** © 2014 The *PLOS ONE* Staff. This is an open-access article distributed under the terms of the Creative Commons Attribution License, which permits unrestricted use, distribution, and reproduction in any medium, provided the original author and source are credited.
